# Supplementary material
Source: publisher figshare collection journal article supplement (https://geolsoc.figshare.com/ndownloader/files/10721584)
Supplement: Supplementary file 1 [file 10721584]

## Sheet: Folha1
Pearson Correlations. Marked correlations are significant at p<0.05
	δ18O	δ13C	SST	Pexp	G. siphonifera	G. falconensis	T. quinqueloba	N. pachyderma	N. dutertrei	G. inflata	G. scitula	G. glutinata	G. ruber (w)	G. truncatulinoides	G.bulloides + N. incompta	O. universa
δ18O	1	0.219416	-0.477529	-0.0868854	-0.503501	-0.35951	0.348617	0.157068	-0.0929647	-0.460119	0.298999	0.275083	-0.419972	-0.507779	0.241123	-0.257388
δ13C	0.219416	1	-0.0122675	0.208686	0.0284112	-0.0945311	-0.0260399	0.00515365	0.0958844	-0.0824909	-0.064879	0.109574	0.00787423	0.192638	0.058941	-0.0770854
SST	-0.477529	-0.0122675	1	0.455809	0.433765	0.163658	-0.634129	-0.443561	0.242306	0.4809	-0.405312	-0.350979	0.561201	0.582422	0.0843051	0.379022
Pexp	-0.0868854	0.208686	0.455809	1	0.179792	0.0598117	-0.363284	-0.351429	0.485939	0.153389	-0.217165	-0.118466	0.1072	0.181505	0.300554	0.119238
G. siphonifera	-0.503501	0.0284112	0.433765	0.179792	1	0.366302	-0.398891	-0.170096	0.0110937	0.382385	-0.17946	-0.196852	0.263636	0.549301	-0.139199	0.403277
G. falconensis	-0.35951	-0.0945311	0.163658	0.0598117	0.366302	1	-0.104384	0.128608	-0.113034	0.211429	0.0222886	-0.15725	-0.0144986	0.174681	-0.103386	0.080472
T. quinqueloba	0.348617	-0.0260399	-0.634129	-0.363284	-0.398891	-0.104384	1	0.262411	-0.0527427	-0.543036	0.691401	0.614157	-0.474835	-0.589994	-0.398097	-0.408126
N. pachyderma	0.157068	0.00515365	-0.443561	-0.351429	-0.170096	0.128608	0.262411	1	-0.449217	-0.113912	-0.0371382	-0.196997	-0.442934	-0.269698	-0.0373931	-0.424624
N. dutertrei	-0.0929647	0.0958844	0.242306	0.485939	0.0110937	-0.113034	-0.0527427	-0.449217	1	-0.148851	-0.132018	0.172075	0.294291	0.20704	-0.122282	0.0239758
G. inflata	-0.460119	-0.0824909	0.4809	0.153389	0.382385	0.211429	-0.543036	-0.113912	-0.148851	1	-0.384895	-0.590105	0.473441	0.5568	-0.238345	0.432276
G. scitula	0.298999	-0.064879	-0.405312	-0.217165	-0.17946	0.0222886	0.691401	-0.0371382	-0.132018	-0.384895	1	0.602538	-0.342268	-0.457256	-0.367677	-0.178384
G. glutinata	0.275083	0.109574	-0.350979	-0.118466	-0.196852	-0.15725	0.614157	-0.196997	0.172075	-0.590105	0.602538	1	-0.259502	-0.395988	-0.215982	-0.217965
G. ruber (w)	-0.419972	0.00787423	0.561201	0.1072	0.263636	-0.0144986	-0.474835	-0.442934	0.294291	0.473441	-0.342268	-0.259502	1	0.698034	-0.267377	0.368362
G. truncatulinoides	-0.507779	0.192638	0.582422	0.181505	0.549301	0.174681	-0.589994	-0.269698	0.20704	0.5568	-0.457256	-0.395988	0.698034	1	-0.249057	0.355066
G.bulloides + N. incompta	0.241123	0.058941	0.0843051	0.300554	-0.139199	-0.103386	-0.398097	-0.0373931	-0.122282	-0.238345	-0.367677	-0.215982	-0.267377	-0.249057	1	-0.156245
O. universa	-0.257388	-0.0770854	0.379022	0.119238	0.403277	0.080472	-0.408126	-0.424624	0.0239758	0.432276	-0.178384	-0.217965	0.368362	0.355066	-0.156245	1
